# Supplementary material for: Asparagine restriction enhances CD8+ T cell metabolic fitness and antitumoral functionality through an NRF2-dependent stress response
Source: PubMed Central journal article supplement (PMC10447245; doi:10.1038/s42255-023-00856-1), 2023-08-07
Supplement: 42255_2023_856_MOESM2_ESM.pdf [file 42255_2023_856_MOESM2_ESM.pdf]

## Reporting Summary

Nature Portfolio wishes to improve the reproducibility of the work that we publish. This form provides structure for consistency and transparency in reporting. For further information on Nature Portfolio policies, see our [Editorial Policies](#) and the [Editorial Policy Checklist](#).

### Statistics

For all statistical analyses, confirm that the following items are present in the figure legend, table legend, main text, or Methods section.

- | n/a                                 | Confirmed                                                                                                                                                                                                                                                                                      |
|-------------------------------------|------------------------------------------------------------------------------------------------------------------------------------------------------------------------------------------------------------------------------------------------------------------------------------------------|
| <input type="checkbox"/>            | <input checked="" type="checkbox"/> The exact sample size ( $n$ ) for each experimental group/condition, given as a discrete number and unit of measurement                                                                                                                                    |
| <input type="checkbox"/>            | <input checked="" type="checkbox"/> A statement on whether measurements were taken from distinct samples or whether the same sample was measured repeatedly                                                                                                                                    |
| <input type="checkbox"/>            | <input checked="" type="checkbox"/> The statistical test(s) used AND whether they are one- or two-sided<br><i>Only common tests should be described solely by name; describe more complex techniques in the Methods section.</i>                                                               |
| <input checked="" type="checkbox"/> | <input type="checkbox"/> A description of all covariates tested                                                                                                                                                                                                                                |
| <input checked="" type="checkbox"/> | <input type="checkbox"/> A description of any assumptions or corrections, such as tests of normality and adjustment for multiple comparisons                                                                                                                                                   |
| <input type="checkbox"/>            | <input checked="" type="checkbox"/> A full description of the statistical parameters including central tendency (e.g. means) or other basic estimates (e.g. regression coefficient) AND variation (e.g. standard deviation) or associated estimates of uncertainty (e.g. confidence intervals) |
| <input type="checkbox"/>            | <input checked="" type="checkbox"/> For null hypothesis testing, the test statistic (e.g. $F$ , $t$ , $r$ ) with confidence intervals, effect sizes, degrees of freedom and $P$ value noted<br><i>Give <math>P</math> values as exact values whenever suitable.</i>                            |
| <input checked="" type="checkbox"/> | <input type="checkbox"/> For Bayesian analysis, information on the choice of priors and Markov chain Monte Carlo settings                                                                                                                                                                      |
| <input checked="" type="checkbox"/> | <input type="checkbox"/> For hierarchical and complex designs, identification of the appropriate level for tests and full reporting of outcomes                                                                                                                                                |
| <input checked="" type="checkbox"/> | <input type="checkbox"/> Estimates of effect sizes (e.g. Cohen's $d$ , Pearson's $r$ ), indicating how they were calculated                                                                                                                                                                    |

*Our web collection on [statistics for biologists](#) contains articles on many of the points above.*

### Software and code

Policy information about [availability of computer code](#)

|                 |                                                                                                                                                                                                                                                                                                                                                                                                                                                                                                                                                                                                                                                                                                                                                                                                                                                                                                                                                    |
|-----------------|----------------------------------------------------------------------------------------------------------------------------------------------------------------------------------------------------------------------------------------------------------------------------------------------------------------------------------------------------------------------------------------------------------------------------------------------------------------------------------------------------------------------------------------------------------------------------------------------------------------------------------------------------------------------------------------------------------------------------------------------------------------------------------------------------------------------------------------------------------------------------------------------------------------------------------------------------|
| Data collection | Flow cytometry by using Novocyte (ACEA Biosciences) software (version 2000); quantitative PCR by using BIO-RAD CFX284TM Real-Time PCR Detection System; RNA-seq quality control and adapter trimming were accomplished using the FastQC (version 0.11.3) and Trim Galore (version 0.4.0) software packages, trimmed reads were mapped to the Genome Reference Consortium GRCm38 (mm10) murine genome assembly using TopHat2 (version 2.1.0), and feature counts were generated using HTSeq (version 0.6.1); 13C-tracer data by using Gas Chromatography-Mass Spectrometry (GC-MS) as standard method; medium metabolites by using Liquid Chromatography-Mass Spectrometry (LC-MS) (metabolon), NMR, or bioanalyzer (YSI, version 2900) as standard method; Oxygen consumption rate (OCR) by using Seahorse XFe96 Analyzer (Agilent Technologies, version 2.6.1) and tumor killing was assessed using eSight (Agilent Technologies, version 1.0.3). |
| Data analysis   | Flow cytometric analysis were performed with FlowJo software (TreeStar, version 10.8.1); RNAseq analysis were performed using the DESeq2 package (version 1.16.1) in R, with the default Benjamini-Hochberg p-value adjustment method, the Ingenuity Pathway Analysis (IPA) software (QIAGEN, version 01-20-04), Metaboanalyst (version 5.0), the Gene Set Enrichment Analysis (GSEA) software (UC San Diego, BROAD Ins. version 4.1.0), ImageJ (version 1.53T)Oxygen consumption rate (OCR) were analysis by using the Seahorse Wave Software (Seahorse, Agilent Technologies, version 2.6); percentage cytolysis were calculated by RTCA PRO (Agilent Technologies, version 2.6.0); Statistical data analysis and generation of graphs by using GraphPad Prism (version 9).                                                                                                                                                                      |

For manuscripts utilizing custom algorithms or software that are central to the research but not yet described in published literature, software must be made available to editors and reviewers. We strongly encourage code deposition in a community repository (e.g. GitHub). See the Nature Portfolio [guidelines for submitting code & software](#) for further information.

## Data

Policy information about [availability of data](#)

All manuscripts must include a [data availability statement](#). This statement should provide the following information, where applicable:

- Accession codes, unique identifiers, or web links for publicly available datasets
- A description of any restrictions on data availability
- For clinical datasets or third party data, please ensure that the statement adheres to our [policy](#)

Raw RNA-seq datasets generated for this study can be found in the GEO accession GSE201870 (<https://www.ncbi.nlm.nih.gov/geo/subs/>). The authors declare that all other data (including the Metabolon and LC-MS metabolomics data) and materials supporting the findings of this study are available within the article (and supplementary/ extended information files).

## Field-specific reporting

Please select the one below that is the best fit for your research. If you are not sure, read the appropriate sections before making your selection.

- Life sciences     Behavioural & social sciences     Ecological, evolutionary & environmental sciences

For a reference copy of the document with all sections, see [nature.com/documents/nr-reporting-summary-flat.pdf](https://www.nature.com/documents/nr-reporting-summary-flat.pdf)

## Life sciences study design

All studies must disclose on these points even when the disclosure is negative.

|                 |                                                                                                                                                                                                                                                                                                                                                                                                                                                                                                                                                                                      |
|-----------------|--------------------------------------------------------------------------------------------------------------------------------------------------------------------------------------------------------------------------------------------------------------------------------------------------------------------------------------------------------------------------------------------------------------------------------------------------------------------------------------------------------------------------------------------------------------------------------------|
| Sample size     | Sample sizes determined on the basis of previous experience in previous experiments. For Metabolon, LC-MS, GS-MS and RNA seq studies 3 independent samples for determination (referring Ratnikov, B. et al. Bioinformatics 2006; Bunk, B. et al. Bioinformatics 2006; Evans, A.M. et al. Anal Chem 2009); for in vitro experiments, 3-6 independent samples were used and for in vivo adoptive transferred experiment, 3-5 and tumor xenograft, 5-10 independent mice were used (referring Wang, T et al. Nat Metab 2020; Wu, R. et al. Sci Adv 2020; Chen, X. et al. Sci Imm 2022). |
| Data exclusions | No excluded from the analysis.                                                                                                                                                                                                                                                                                                                                                                                                                                                                                                                                                       |
| Replication     | All experiments were conducted with at least two independent experiments and multiple biological replicates (except metabolomics was performed one time and 3 biological replicates), and the details was provided in corresponding figure legends.                                                                                                                                                                                                                                                                                                                                  |
| Randomization   | All studies were performed on age and gender matched animals. Litter-mate animals were randomized prior to experiments. Samples for in vitro experiments were not randomized because they were defined groups by genotype and treatments.                                                                                                                                                                                                                                                                                                                                            |
| Blinding        | Investigators were not blinded during the data collection and data analysis because all analysis were performed using same gating as control under the same condition.                                                                                                                                                                                                                                                                                                                                                                                                               |

## Reporting for specific materials, systems and methods

We require information from authors about some types of materials, experimental systems and methods used in many studies. Here, indicate whether each material, system or method listed is relevant to your study. If you are not sure if a list item applies to your research, read the appropriate section before selecting a response.

### Materials & experimental systems

| n/a                                 | Involved in the study                                           |
|-------------------------------------|-----------------------------------------------------------------|
| <input type="checkbox"/>            | <input checked="" type="checkbox"/> Antibodies                  |
| <input type="checkbox"/>            | <input checked="" type="checkbox"/> Eukaryotic cell lines       |
| <input checked="" type="checkbox"/> | <input type="checkbox"/> Palaeontology and archaeology          |
| <input type="checkbox"/>            | <input checked="" type="checkbox"/> Animals and other organisms |
| <input checked="" type="checkbox"/> | <input type="checkbox"/> Human research participants            |
| <input checked="" type="checkbox"/> | <input type="checkbox"/> Clinical data                          |
| <input checked="" type="checkbox"/> | <input type="checkbox"/> Dual use research of concern           |

### Methods

| n/a                                 | Involved in the study                              |
|-------------------------------------|----------------------------------------------------|
| <input checked="" type="checkbox"/> | <input type="checkbox"/> ChIP-seq                  |
| <input type="checkbox"/>            | <input checked="" type="checkbox"/> Flow cytometry |
| <input checked="" type="checkbox"/> | <input type="checkbox"/> MRI-based neuroimaging    |

## Antibodies

Antibodies used

Flowcytomtery antibodies  
 APC anti-mouse IFN- $\gamma$  Antibody BioLegend 505810, Cat # 1:200 dilution  
 PE/Cyanine7 anti-mouse IFN- $\gamma$  Antibody BioLegend 505826, Cat # 1:200 dilution  
 APC Anti-mouse TNF- $\alpha$  BioLegend 506308, Cat # 1:200 dilution

APC/Cyanine7 anti-mouse CD8a Antibody BioLegend 100714, Cat # 1:300 dilution  
 APC anti-mouse TCR  $\beta$  chain Antibody BioLegend 109211, Cat # 1:100 dilution  
 PE NRF2 rabbit monoclonal Antibody Cell signaling 14409, Cat # 1:100 dilution  
 APC/Cyanine7 anti-mouse thy1.1 Antibody BioLegend 202520, Cat # 1:100 dilution  
 Percp anti-mouse thy1.2 Antibody BioLegend 140316, Cat # 1:100 dilution  
 CD25 Monoclonal Antibody (PC61.5), PE eBioscience 12-0251, Cat # 1:300 dilution  
 FITC anti-mouse CD8 Antibody BioLegend 100705, Cat # 1:200 dilution  
 APC/Cyanine7 anti-human CD8a Antibody BioLegend 300926, Cat # 1:200 dilution  
 PE/Cyanine7 anti-human IFN- $\gamma$  Antibody BioLegend 506518, Cat # 1:200 dilution  
 PE anti-human TNF- $\alpha$  Antibody BioLegend 502909, Cat # 1:200 dilution  
 PE/Cyanine7 anti-mouse CD4 BioLegend 100422, Cat # 1:200 dilution  
 PE Glut1 Antibody Novus Biologicals NB110-39113, Cat # 1:100 dilution  
 PE Asparagine synthetase Antibody Santa Cruz SC-365809 1:100 dilution  
 T cell activation and immunotherapy antibodies:  
 InVivoMAb anti m PD-L1 BioXcell BE0101, Cat # 200  $\mu$ g per dose  
 InVivoMAb anti m PD-1 BioXcell BE0146, Cat # 200  $\mu$ g per dose  
 InVivoMAb Rat IgG2b Isotype control BioXcell BE0090, Cat # 200  $\mu$ g per dose  
 InVivoMAb anti-mouse CD3 BioXcell BE0001, Cat # 2-5  $\mu$ g/ml  
 InVivoMAb anti-mouse CD28 BioXcell BE0015, Cat # 2-5  $\mu$ g/ml  
 Anti-human CD3 (OKT-3) BioXcell BE0001, Cat # 1  $\mu$ g/ml  
 Anti-human CD28 BioXcell BE0291, Cat # 1  $\mu$ g/ml  
 Recombinant Murine IL-12 p70 Peprotech 210-12, Cat # 5 ng/ml  
 Recombinant Murine IL-2 Peprotech 212-12 H1111, Cat # 5 ng/ml  
 Confocal/IB antibodies:  
 Asparagine synthetase (G-10) Santa Cruz sc-365809, Cat # 0.215277778  
 anti-actin Santa Cruz sc47778, Cat # 0.736111111  
 ATF-4 (D4B8) Rabbit mAb # Cell Signaling 11815S, Cat # 0.736111111  
 NRF2 (D129C) XP Cell Signaling 12721S, Cat # 0.388888889  
 NRF2 (A 10) Santa Cruz 365949, Cat # 0.736111111  
 Anti-mouse IgG, HRP-linked Antibody Cell Signaling 7076, Cat # 2.125  
 Anti-rabbit IgG, HRP-linked Antibody Cell Signaling 7074, Cat # 2.125  
 Anti-Mouse IgG (H+L), (Alexa Fluor<sup>®</sup> 647) Cell Signaling 4410S, Cat # 0.736111111

## Validation

Reactivity of above antibodies are commercially available and validated for indicated applications, all information on manufacturer's homepage and have been extensively referenced in literatures.  
<https://bxccl.com/>  
<https://www.biolegend.com/>  
<https://www.scbt.com/home>  
<https://www.thermofisher.com/us/en/home/life-science/antibodies/ebioscience>  
<https://www.cellsignal.com/>  
<https://www.sigmaldrich.com/US/en>

## Eukaryotic cell lines

Policy information about [cell lines](#)

## Cell line source(s)

B16F10 from ATCC, LAN-1 from Dr. Xiaotong Song (Wang, T et al. Nat Metab 2020;), B16-gp100 from Dr. Nicholas Restifo (Vodnala, S.K et al. Science 2019) and CMT167 from Dr. Williams Terence (Ismail et al. Cancer Res 2000).

## Authentication

Cell lines used in this study were purchased from ATCC or from other research groups and were not authenticated.

## Mycoplasma contamination

Cell lines used in this study were not tested for Mycoplasma contamination.

Commonly misidentified lines  
(See [ICLAC](#) register)

No commonly misidentified cell line was used in this study.

## Animals and other organisms

Policy information about [studies involving animals](#); [ARRIVE guidelines](#) recommended for reporting animal research

## Laboratory animals

WT mouse: C57BL/6NJ, WT mouse: B6.129S4-Ifnytm3.1lky/J, Pmel-1 mouse: B6.Cg-Thy1a/CyTg(TcraTcrb)8Rest/J, NRF2 KO mouse: B6.129X1-Nfe2l2tm1Ywk/J, Rag1-/- mouse: B6.129S7-Rag1tm1Mom/J, CD45.1 mouse: B6.SJL-Ptprca Pepcb/BoyJ, ATF4 KI mouse: B6;129X1-Gt(ROSA)26Sortm2(ATF4)Myz/J, B-NDG mouse: NOD.CB17-Prkdcscid IL2rgtm1/BcgenHsd, ATF4 KO mouse: ATF4fl/fl ASNS KO mouse: C57BL/6N-Asns tm1a(EUCOMM)Wtsi/H) mice. Both male and female mice, with age-matched (6-12 weeks old) were used in the experiments. Mice were housed under controlled conditions: rodent housing rooms are kept at 73 degree Fahrenheit, with alarms set at 69 and 78 degrees, 30–70% relative humidity, and 12:12 light-dark cycle. Food and water was available for all animals. Low Fat diet were provided (Envigo 2920, the irradiated form of 2020X\*). Mice were maintained and euthanized (by carbon dioxide asphyxiation followed by cervical dislocation) under protocols approved by the Institutional Animal Care and Use Committee of the Research Institute at Nationwide Children's Hospital (IACUC; protocol number AR13-00055). \*<https://insights.envigo.com/hubfs/resources/data-sheets/2020x-datasheet-0915.pdf>

## Wild animals

This study does not include any wild animals.

Field-collected samples

Ethics oversight

Note that full information on the approval of the study protocol must also be provided in the manuscript.

## Flow Cytometry

### Plots

Confirm that:

- The axis labels state the marker and fluorochrome used (e.g. CD4-FITC).
- The axis scales are clearly visible. Include numbers along axes only for bottom left plot of group (a 'group' is an analysis of identical markers).
- All plots are contour plots with outliers or pseudocolor plots.
- A numerical value for number of cells or percentage (with statistics) is provided.

### Methodology

Sample preparation

Instrument

Software

Cell population abundance

Gating strategy

- Tick this box to confirm that a figure exemplifying the gating strategy is provided in the Supplementary Information.
