# Supplementary material for: Asparagine restriction enhances CD8+ T cell metabolic fitness and antitumoral functionality through an NRF2-dependent stress response
Source: PubMed Central journal article supplement (PMC10447245; doi:10.1038/s42255-023-00856-1), 2023-08-07
Supplement: 42255_2023_856_MOESM14_ESM.pdf [file 42255_2023_856_MOESM14_ESM.pdf]

Confocal image for control- NRF2 (red)

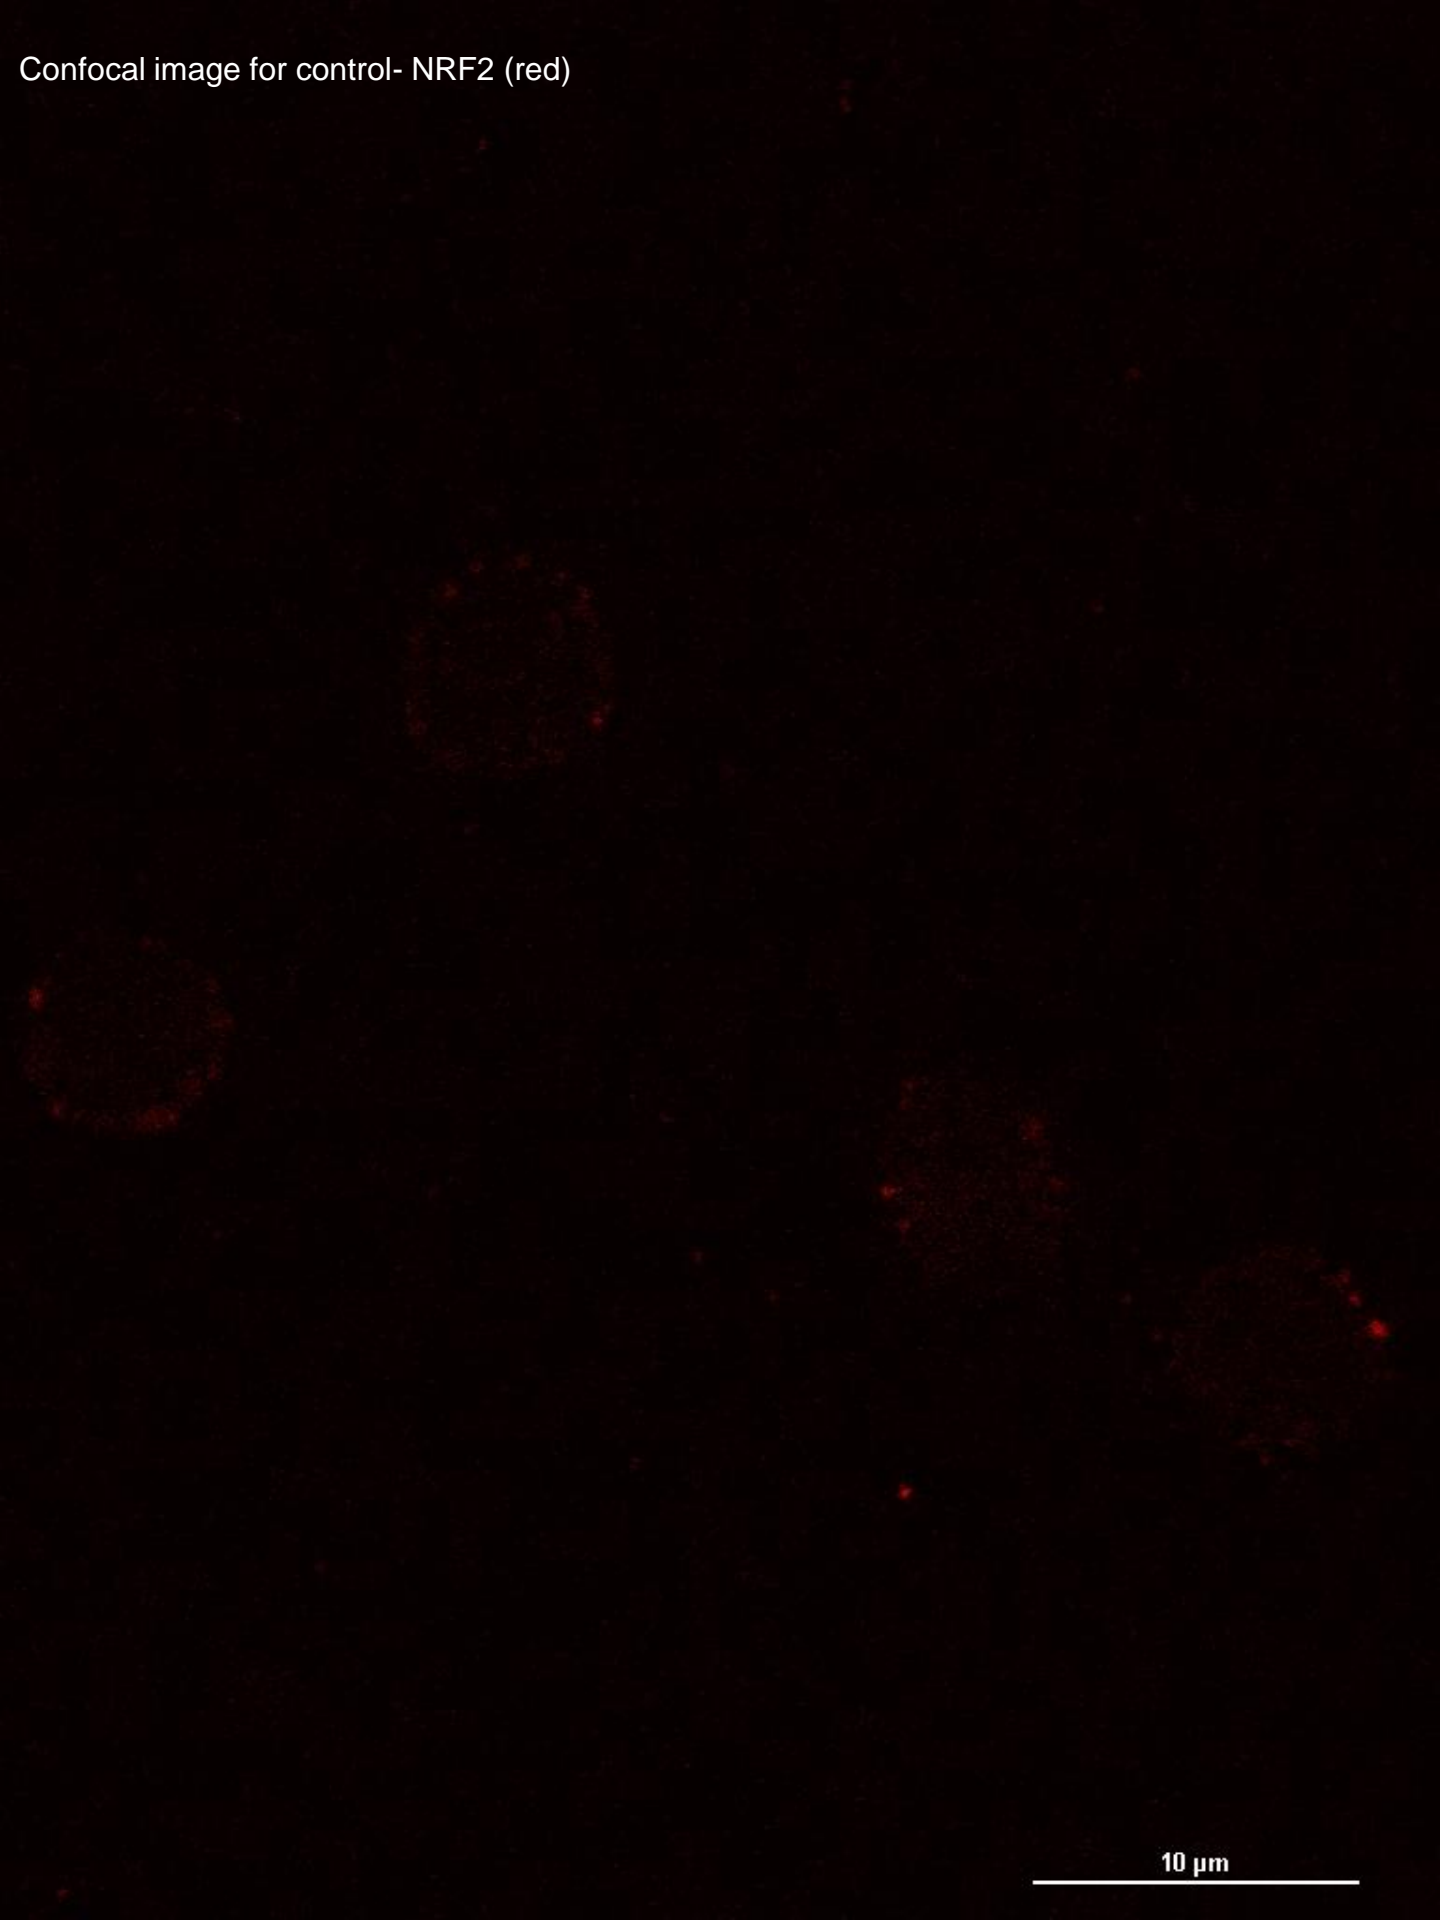

10  $\mu$ m

Confocal image for control- DAPI (blue)

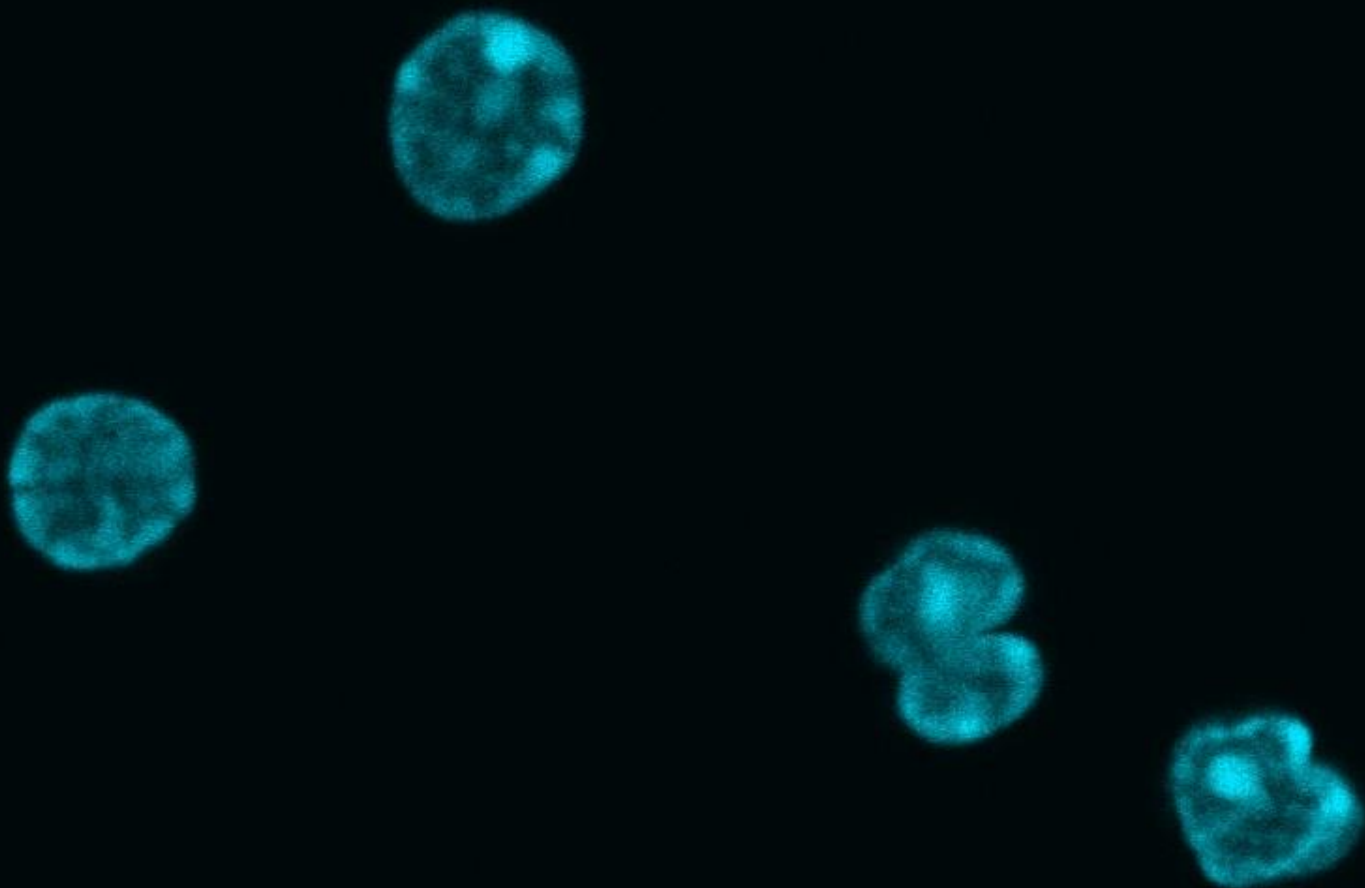

10  $\mu$ m

Confocal image for control- NRF2 (red)+DAPI (blue) merged

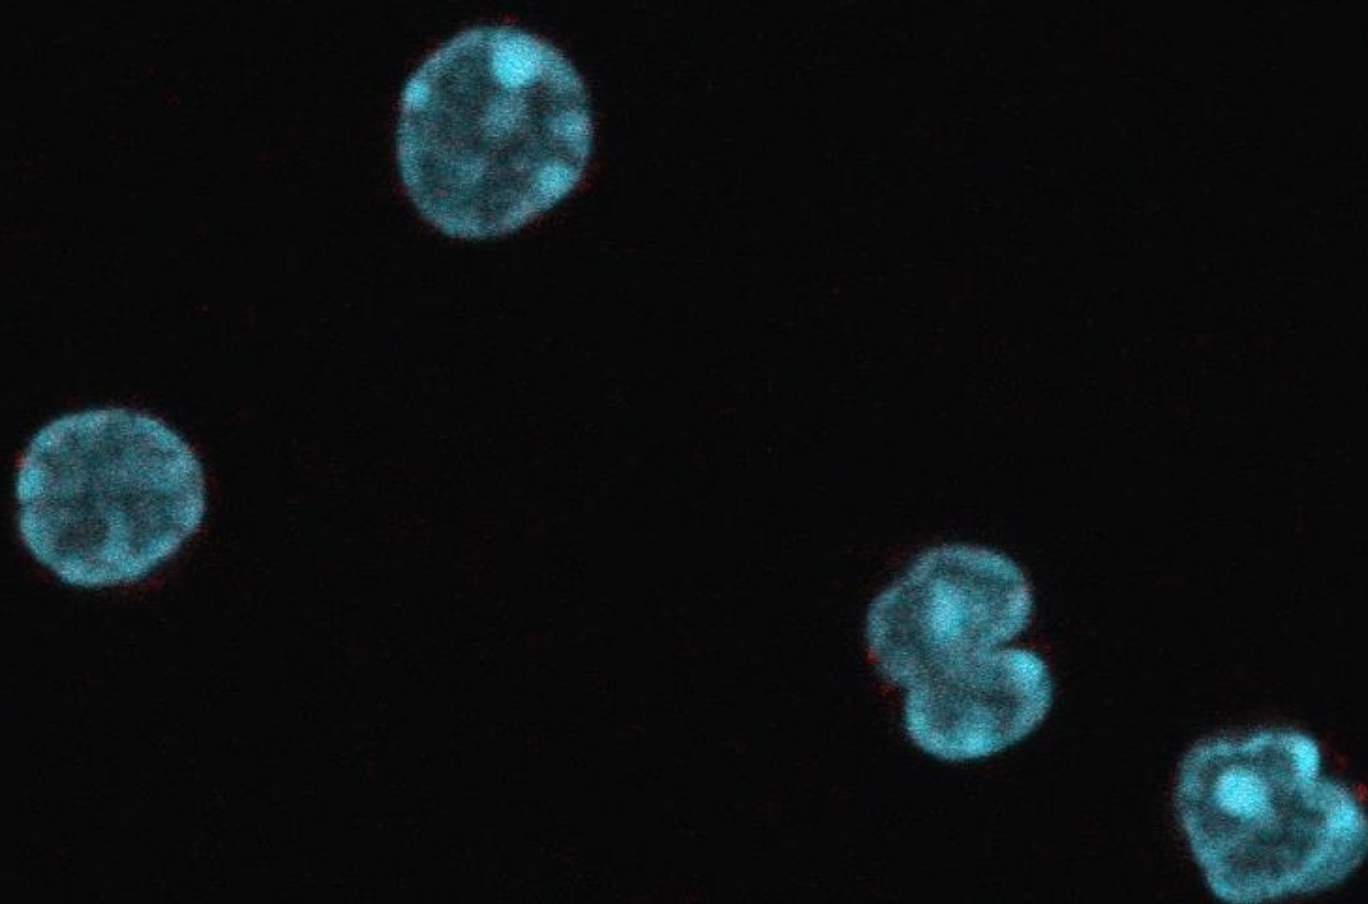

10  $\mu$ m

Confocal image for Asn restriction -NRF2 (red)

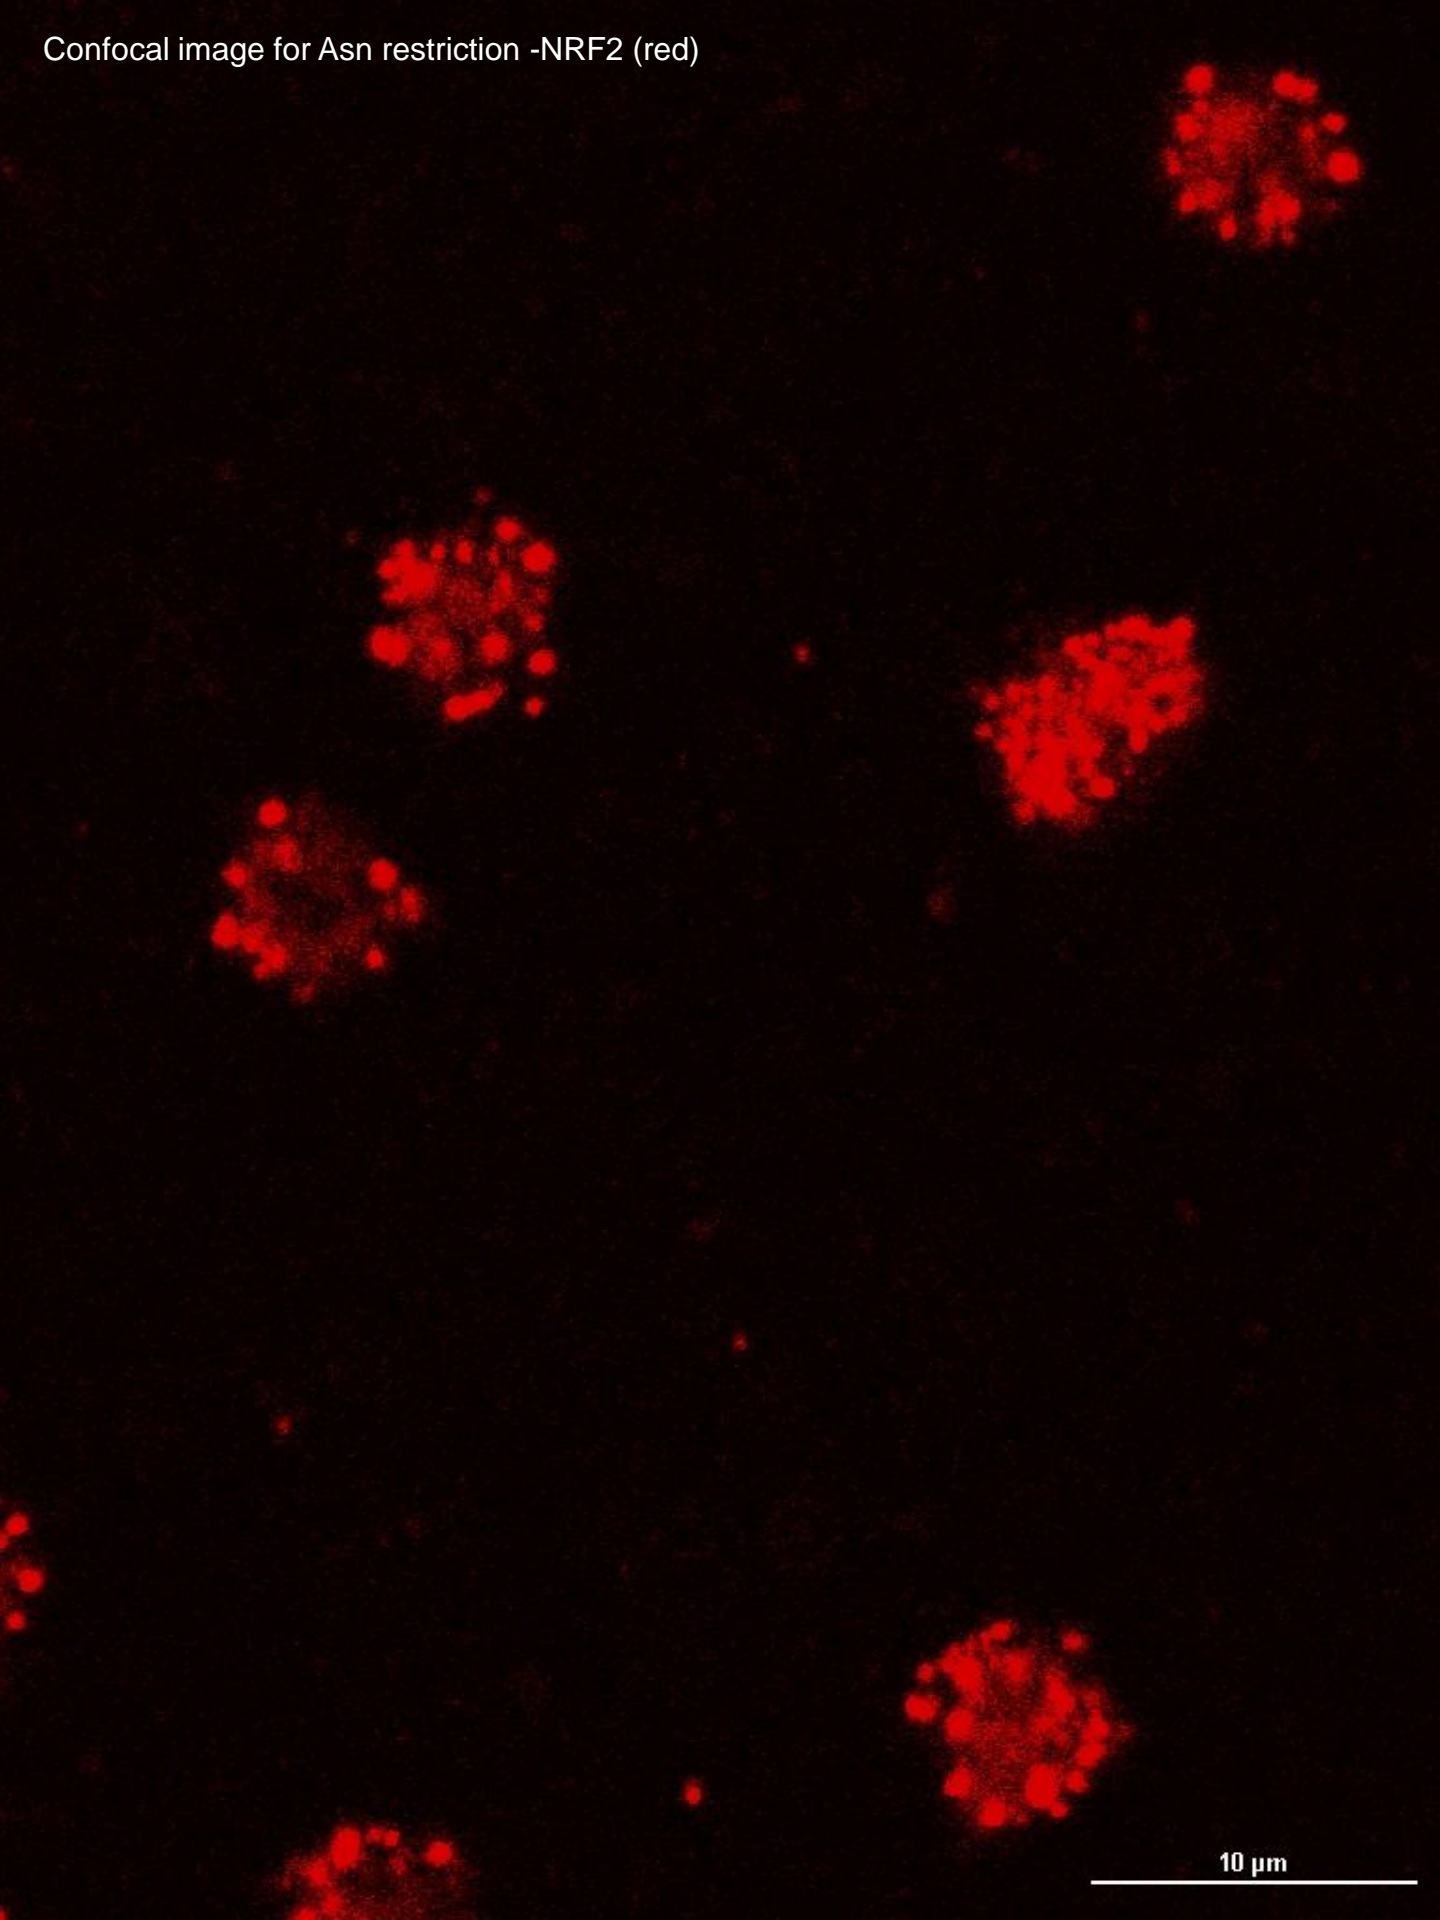

10 μm

Confocal image for Asn restriction -DAPI (blue)

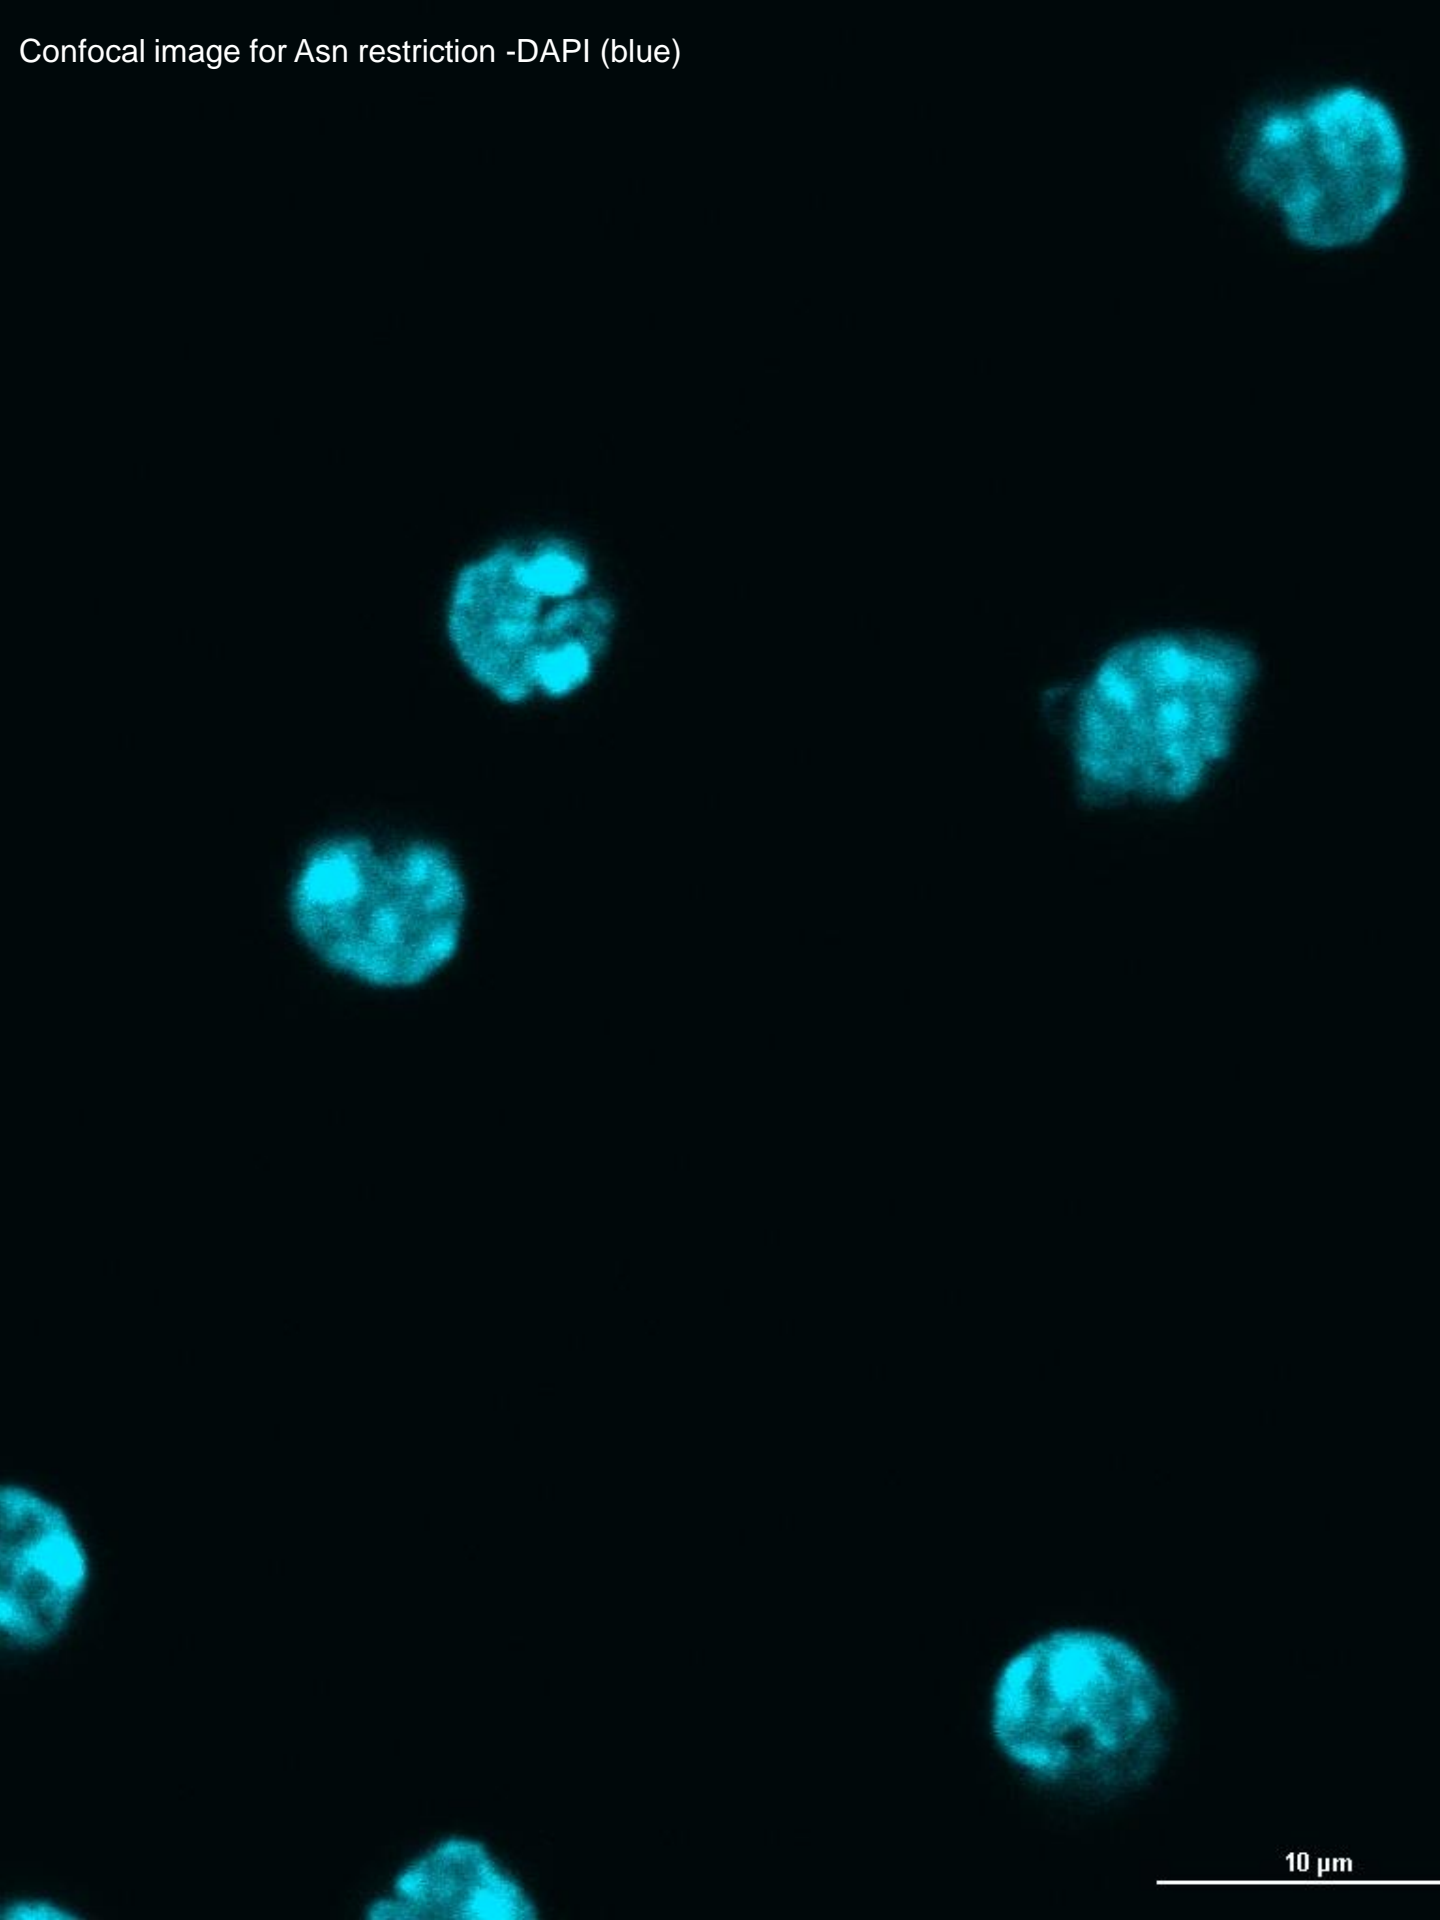

10 μm

Confocal image for Asn restriction -NRF2 (red)+DAPI (blue) merged

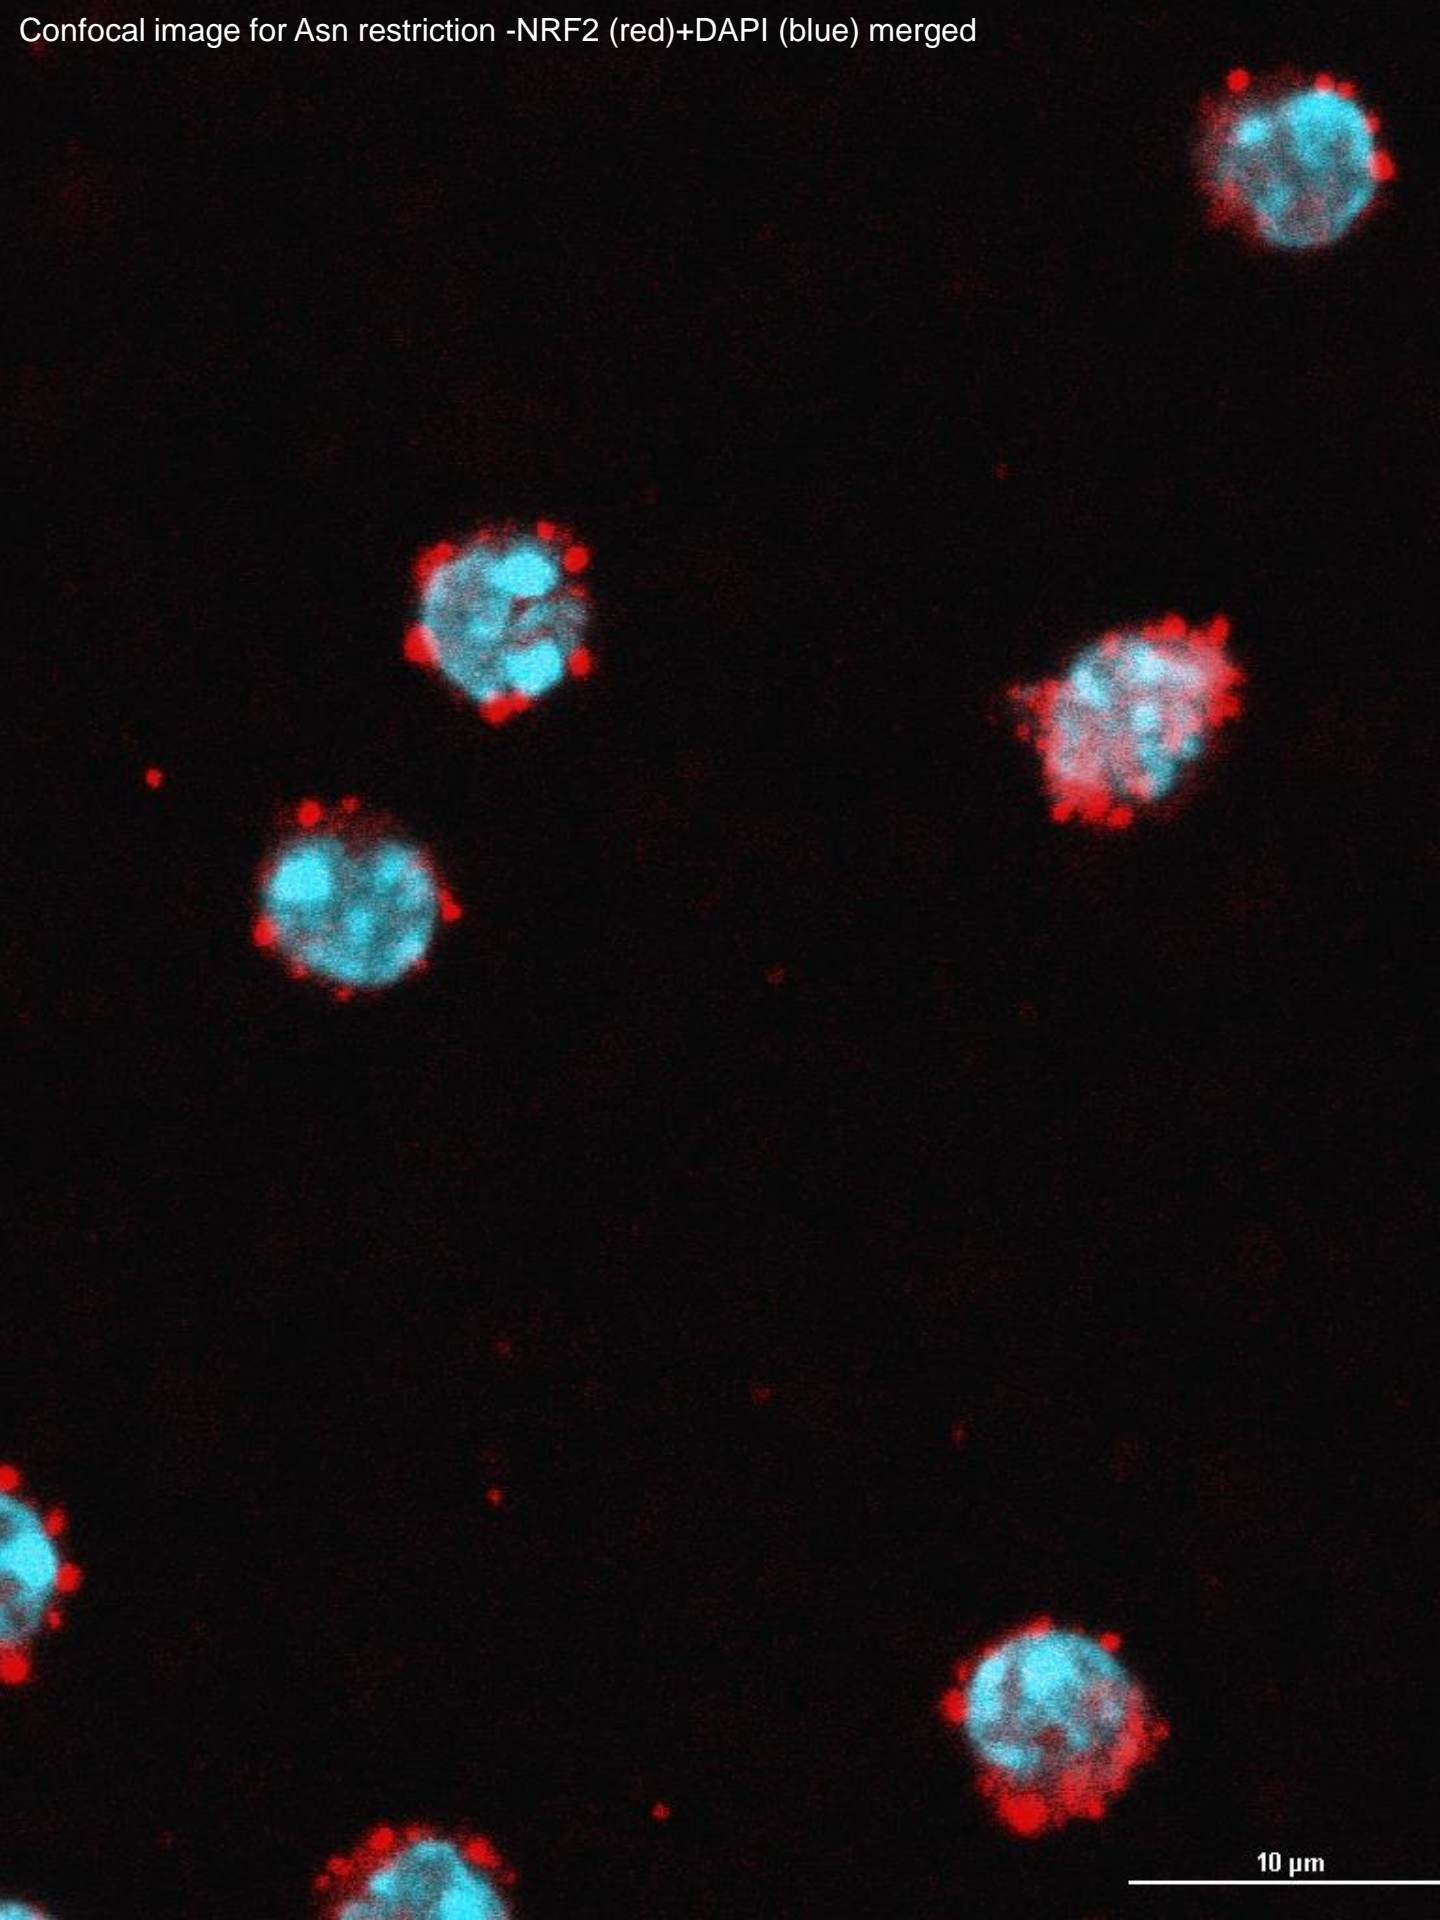

10 μm
